# Supplementary material for: Cationic defect-engineered CuMn 2 O 4 photothermal membranes to leverage interfacial solar steam generation
Source: Royal Society of Chemistry journal article supplement (doi:10.1039/d5ta08030d), 2025-12-02
Supplement: d5ta08030d1.pdf [file d5ta08030d1.pdf]

## Supporting Information

### Cationic defects engineered CuMn<sub>2</sub>O<sub>4</sub> photothermal membrane to leverage interfacial solar steam generation

Harshada S. Jadhav,<sup>a</sup> Ekta Choudhary,<sup>b</sup> Manopriya Samtham,<sup>a</sup> Ajay Patil,<sup>a</sup> Suman Yadav,<sup>a</sup> Sameena R. Mulani,<sup>a</sup> Rajashri Urkude,<sup>c</sup> Ravindra Jangir,<sup>d,e</sup> Parvez A. Shaikh,<sup>f,\*\*</sup> and Rupesh S. Devan<sup>a,g,\*</sup>

- <sup>a</sup>. Department of Metallurgical Engineering and Materials Science, Indian Institute of Technology Indore, Simrol, Khandwa Road, Indore, 453552, India. rupesh@iiti.ac.in
- <sup>b</sup>. Department of Physics, Indian Institute of Technology Indore, Simrol, Khandwa Road, Indore, 453552, India.
- <sup>c</sup>. Beamline Development and Application Section, Bhabha Atomic Research Centre, Mumbai 400085, India.
- <sup>d</sup>. Accelerator Physics and Synchrotrons Utilization Division, Raja Ramanna Centre for Advanced Technology, Indore 452013, India.
- <sup>e</sup>. Homi Bhabha National Institute, Anushakti Nagar, Mumbai 400094, India.
- <sup>f</sup>. Department of Physics, AKI's Poona College of Arts, Science and Commerce, affiliated to Savitribai Phule Pune University, Pune 411001, India. parvezshaikh0@gmail.com
- <sup>g</sup>. Centre for Electric Vehicle & Intelligent Transport System, Indian Institute of Technology Indore, Khandwa Road, Simrol, Indore, 453552, India.

#### A) Complex Impedance Spectroscopy analysis

Complex Impedance Spectroscopy (CIS) is a very useful tool for studying the electrical properties of materials that exhibit a complex interplay of conductive and insulating behavior, even with very small amount of compositional change. CIS enables the clear separation of bulk (intra-grain) through impedance (Z) formalisms.

The complex impedance  $Z^*(\omega)$  can be defined as:

$$Z^* = Z'(\omega) + j Z''(\omega) \quad (1)$$

where  $Z'$  and  $Z''$  ascribed to the real and imaginary parts of impedance, respectively, are derived as follows:

$$Z' = \frac{R_G}{1 + (\omega R_G C_G)^2} + \frac{R_{GB}}{1 + (\omega R_{GB} C_{GB})^2} \quad (2)$$

and

$$-Z'' = R_G \left( \frac{\omega R_G C_G}{1 + (\omega R_G C_G)^2} \right) + R_{GB} \left( \frac{\omega R_{GB} C_{GB}}{1 + (\omega R_{GB} C_{GB})^2} \right) \quad (3)$$

The shift in frequency peak positions to the higher side with increasing temperature represents the temperature-dependent electrical relaxation phenomena present in the material (Fig. S1). Generally, the activation energy of relaxation phenomena is determined from the Arrhenius Eq. (4),

$$f_{Z_{max}}'' = B \exp(-E_a/K_B T) \quad (4)$$

Where,  $E_a$  is the activation energy,  $B$  is the pre-exponential factor,  $K_B$  is the Boltzmann constant, and  $T$  is the temperature.  $f_{Z_{max}}''$  is the frequency at which the maxima occur in the  $Z''$ .  $f_{Z_{max}}''$  and  $T$  are determined experimentally.  $E_a$  is determined by fitting the Arrhenius plot of  $\ln(f_{Z_{max}}'')$  versus  $1/K_B T$ , as shown in Fig. S1.

Activation energies ( $E_a$ ) determined from the linear fitting of the Arrhenius plot are 0.129 eV for  $\text{CMO}_{\text{NP}}$  and 0.144 eV for  $\text{CMO}_{\text{NF}}$ . This activation energy is attributed to the charge transfer between  $\text{Mn}^{4+}/\text{Mn}^{3+}$  sites.<sup>1</sup> Change in the  $E_a$  value for  $\text{CMO}_{\text{NF}}$  indicates modifications in the defect states, which directly influence charge-transport mechanisms. Since activation energy represents the barrier for carrier movement in the defect-mediated conduction process in metal oxides, this increment suggests altered defect dynamics in  $\text{CMO}_{\text{NF}}$ .

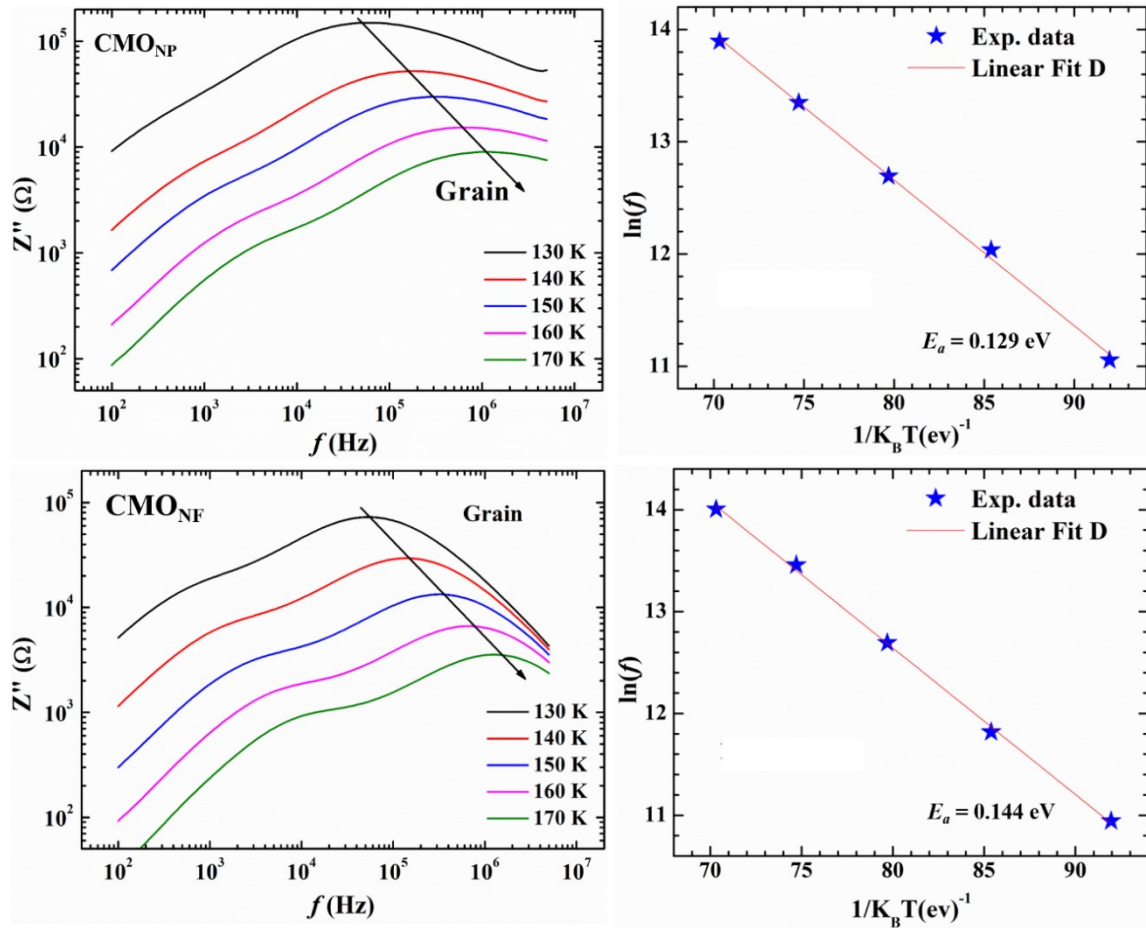

Fig. S1. Frequency-dependent plots of the imaginary part of impedance ( $Z''$ ) measured at various temperatures and the linearly fitted Arrhenius plots for CMO<sub>NP</sub> (upper panel) and CMO<sub>NF</sub> lower panel.

## References

- [1] A. Leonarska, M. G. Kądziołka, A.Z. Szeremeta, *J. Mater. Sci.*, **2017**, 52, 2222–2231.
